# Supplementary material for: Effect of phosphodiesterase-type 5 inhibitors on erectile function: an overview of systematic reviews and meta-analyses
Source: PubMed Central journal article supplement — BMJ Open. 2021 Aug 24;11(8):e047396. doi: 10.1136/bmjopen-2020-047396 (PMC8386228; doi:10.1136/bmjopen-2020-047396), 2021-08-24
Supplement: bmjopen-2020-047396supp002.pdf [file bmjopen-2020-047396supp002.pdf]

## Data Supplement 2: PubMed search strategy

| <b>ID</b> | <b>Search</b>                               |
|-----------|---------------------------------------------|
| #1        | Sildenafil [All Fields]                     |
| #2        | Avanafil [All Fields]                       |
| #3        | Tadalafil [All Fields]                      |
| #4        | Vardenafil [All Fields]                     |
| #5        | Mirodenafil [All Fields]                    |
| #6        | Lodenafil [All Fields]                      |
| #7        | Udenafil [All Fields]                       |
| #8        | Phosphodiesterase-5 [All Fields]            |
| #9        | Phosphodiesterase 5 [All Fields]            |
| #10       | Phosphodiesterase Five [All Fields]         |
| #11       | Sildenafil Citrate [MeSH Terms]             |
| #12       | Phosphodiesterase 5 Inhibitors [MeSH Terms] |
| #13       | OR #1-12                                    |
| #14       | Sexual [All Fields]                         |
| #15       | Orgasm [All Fields]                         |
| #16       | Erectile [All Fields]                       |
| #17       | Erection [All Fields]                       |
| #18       | Impotence [All Fields]                      |
| #19       | IIEF [All Fields]                           |
| #20       | Orgasm [MeSH Terms]                         |
| #21       | Erectile Dysfunction [MeSH Terms]           |
| #22       | Penile Erection [MeSH Terms]                |
| #23       | OR #14-22                                   |
| #24       | Meta-Analysis [All Fields]                  |
| #25       | Metanalysis [All Fields]                    |
| #26       | Meta Analysis [All Fields]                  |
| #27       | Meta-analysis [Publication Type]            |
| #28       | Systematic Review [All Fields]              |
| #29       | Systematic Review [Publication Type]        |
| #30       | OR #24-29                                   |
| #31       | #13 AND #23 AND #30                         |

The search strategy was developed for PubMed and modified accordingly for the other databases.
